# Supplementary material
Source: publisher site journal article supplement (https://www.dovepress.com/get_supplementary_file.php?f=475940.docx)

Title: EIF4A3 enhances the proliferation and cell cycle progression of keloid fibroblasts by inducing the Hsa_circ_0002198 expression

Table S1


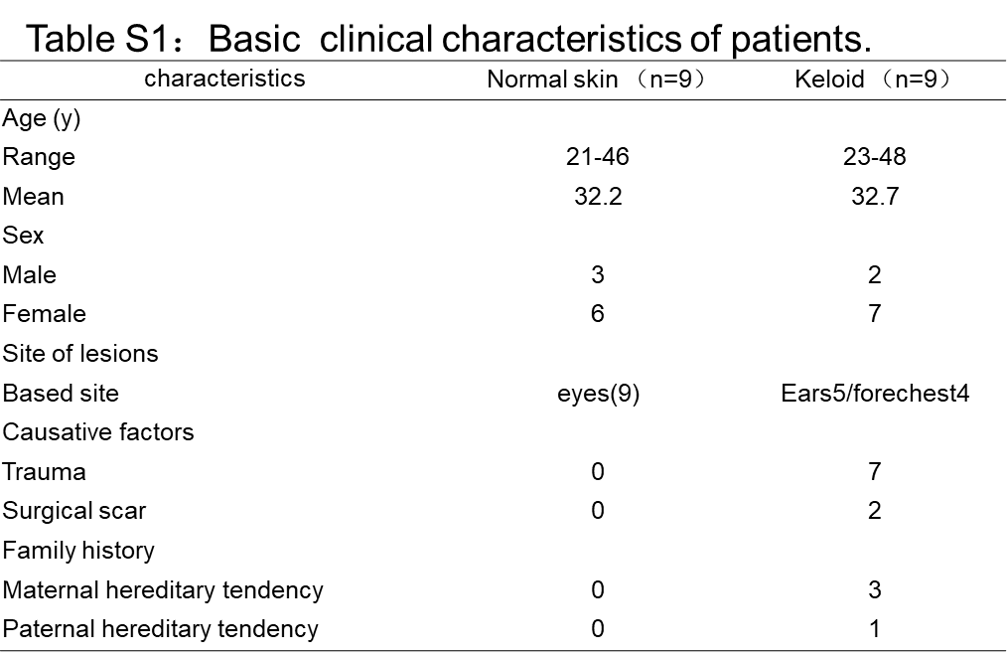


Table S2


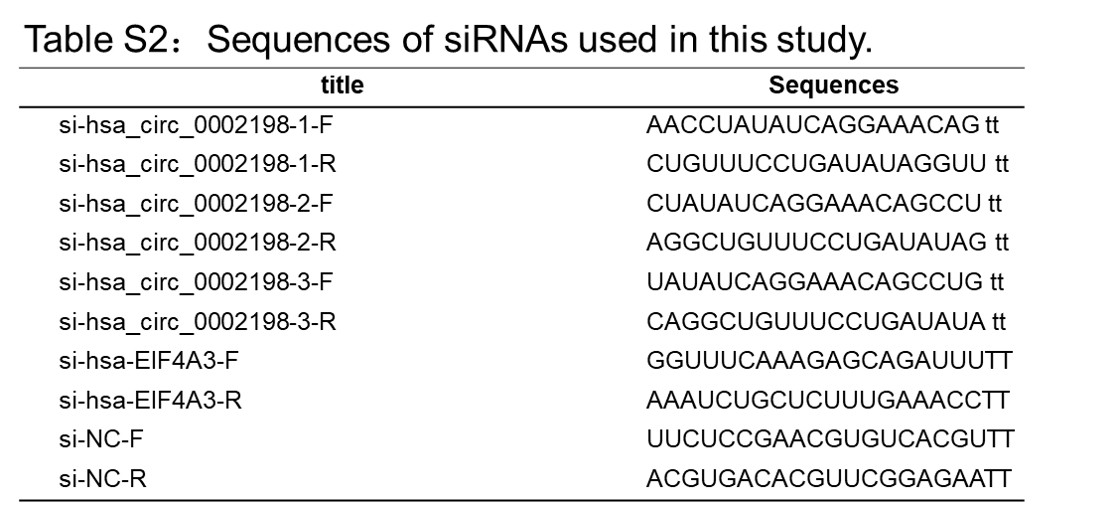

Supplement: Supplementary file 1 [file get_supplementary_file.php]
